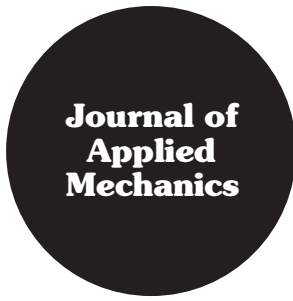

# ERRATUM

**Erratum: “On the Mechanical Modeling of Functionally Graded Interfacial Zone With a Griffith Crack: Anti-Plane Deformation” [ASME J. Appl. Mech., 2003, 70, pp. 676–680]**

Y. S. Wang, G.-Y. Huang, and D. Gross

---

The name of the third author should read D. Gross.
